# Supplementary material for: 3D Co-Printing and Substrate Geometry Influence the Differentiation of C2C12 Skeletal Myoblasts
Source: MDPI journal article supplement (doi:10.3390/gels9070595), 2023-07-24
Supplement: s1 [file s1]

## Supporting information

**Table S1.** Summary of primers used for qRT-PCR.

| Gene               | Primer sequences                                                               |
|--------------------|--------------------------------------------------------------------------------|
| PGK (115 bp)       | Fw 5' CAA AAT GTC GTC TTC CAA CAA G 3'<br>Rw 5' AAC GTT GAA GTC CAC CCT CAT 3' |
| MyoD (115 bp)      | Fw 5' TGCACTTCCACCAACCCCAACCAGC 3'<br>Rw 5' CCTGGACTCGCGCACCGCCTCACT 3'        |
| Myf5 (176 bp)      | Fw 5' GCCCTGAGGAAGAGGAACAC 3'<br>Rw 5' CAAGGTCTCGAATGCTTGGT 3'                 |
| Cyclin D1 (150 bp) | Fw 5' TCCTGCTACCGCACAACGC 3'<br>Rw 5' CCAGCTTCTTCCTCCACTTCCC 3'                |
| MyoG (152 bp)      | Fw 5' GGGCCCCTGGAAGAAAAG 3'<br>Rw 5' AGGAGGCGCTGTGGGAGTT 3'                    |
| MCK (103 bp)       | Fw 5' CCTGTTTGATCCCATCATCC 3'<br>Rw 5' AGCACATAGTTGGGGTCCAG 3'                 |
| Myh1 (113 bp)      | Fw 5' AGTCCCAGGTCAACAAGCTG 3'<br>Rw 5' CACATTTTGCTCATCTCTTTG 3'                |
| MCad (...)         | Fw5' CTTGGGTGCCACGGATGA 3'<br>Rw 5' ATGCAGGCCCTCGGAGAC 3                       |
